# Supplementary figures and images for: Engineering Rapalog-Inducible Genetic Switches Based on Split-T7 Polymerase to Regulate Oncolytic Virus-Driven Production of Tumour-Localized IL-12 for Anti-Cancer Immunotherapy
Source: MDPI journal article supplement (doi:10.3390/ph16050709), 2023-05-07

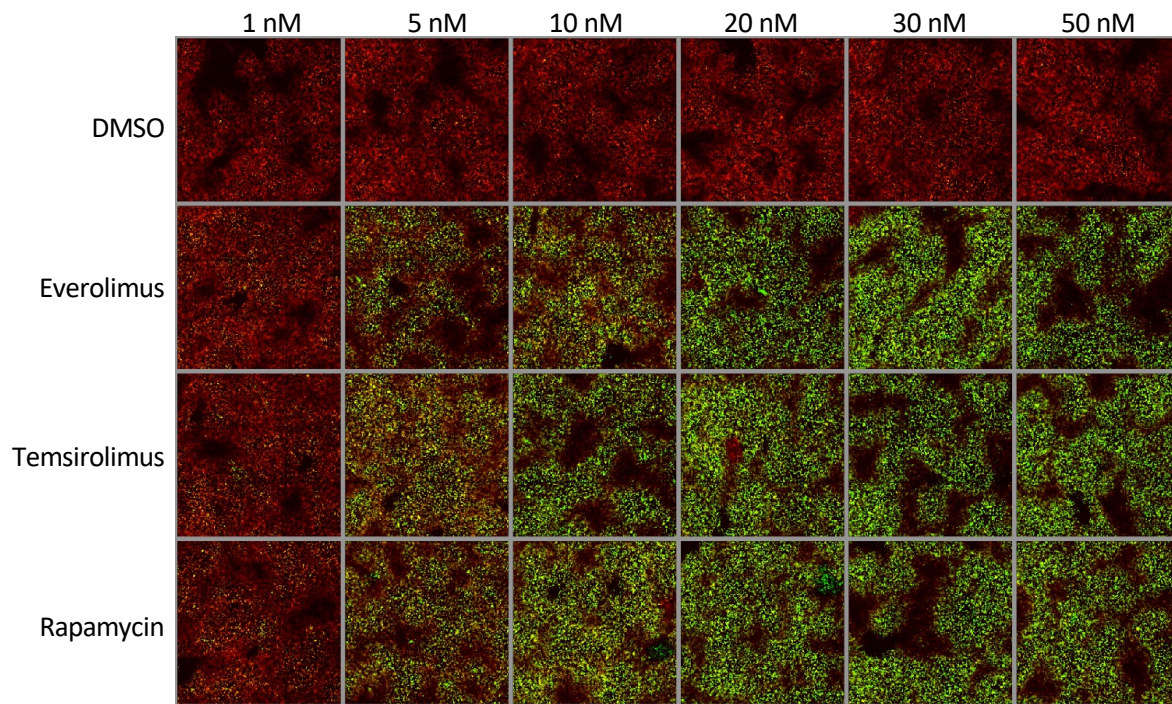

**b**

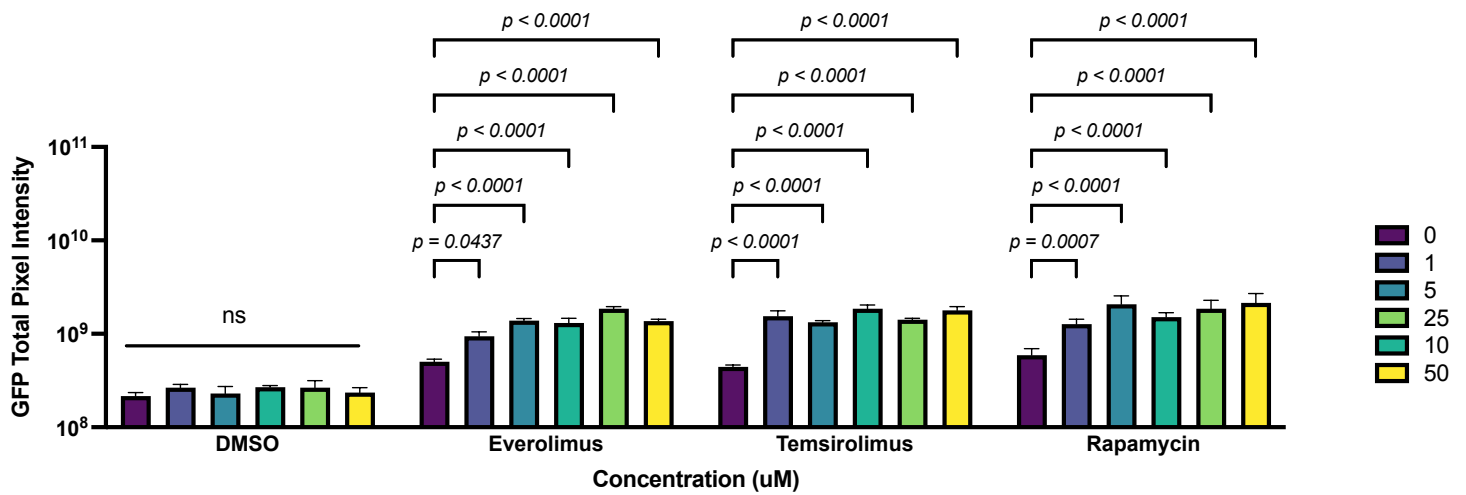

**C**

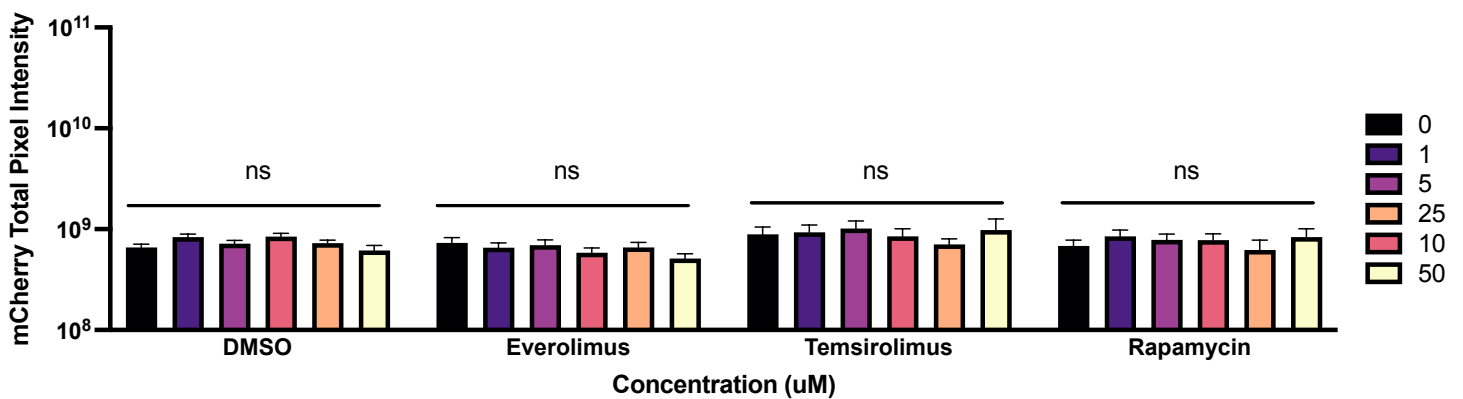

**a**

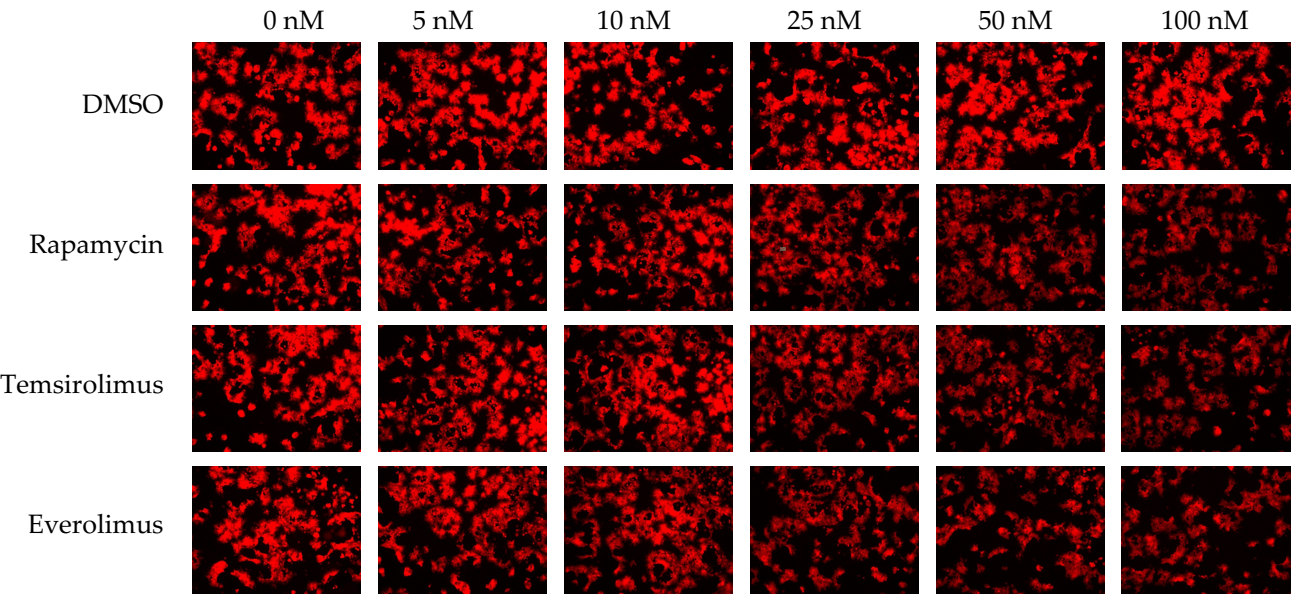

**b**

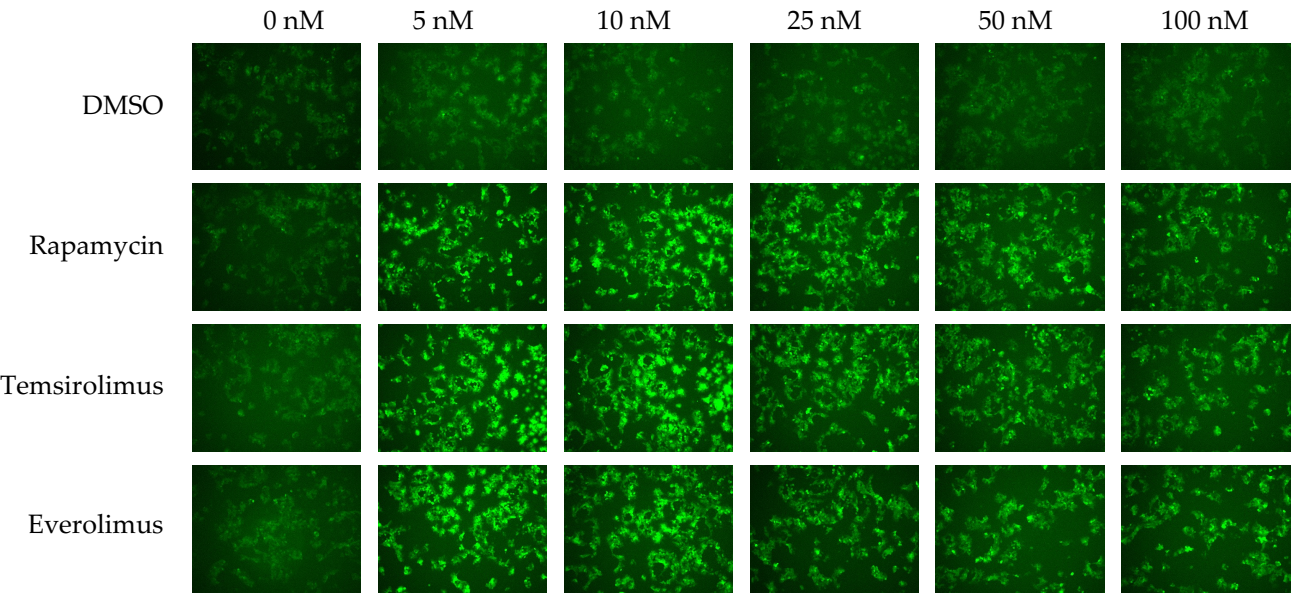

a

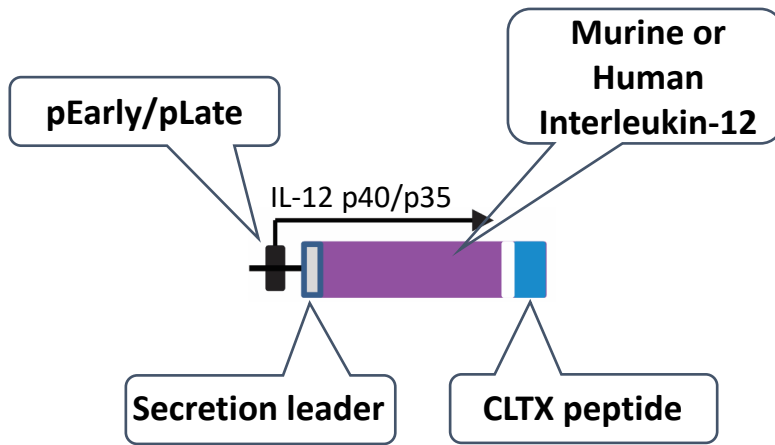

b

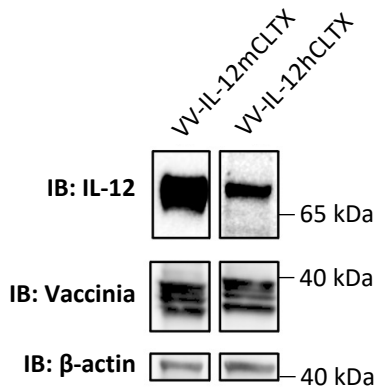

c

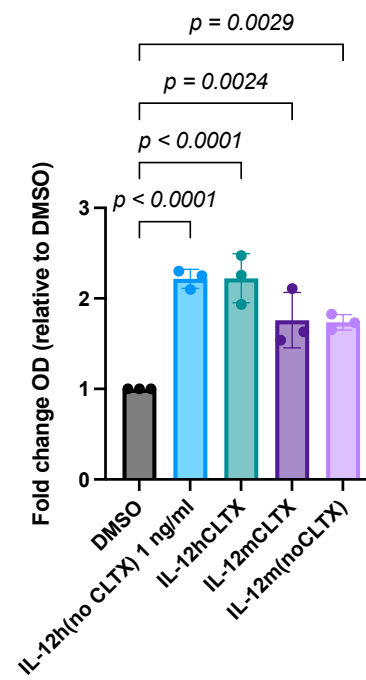

a

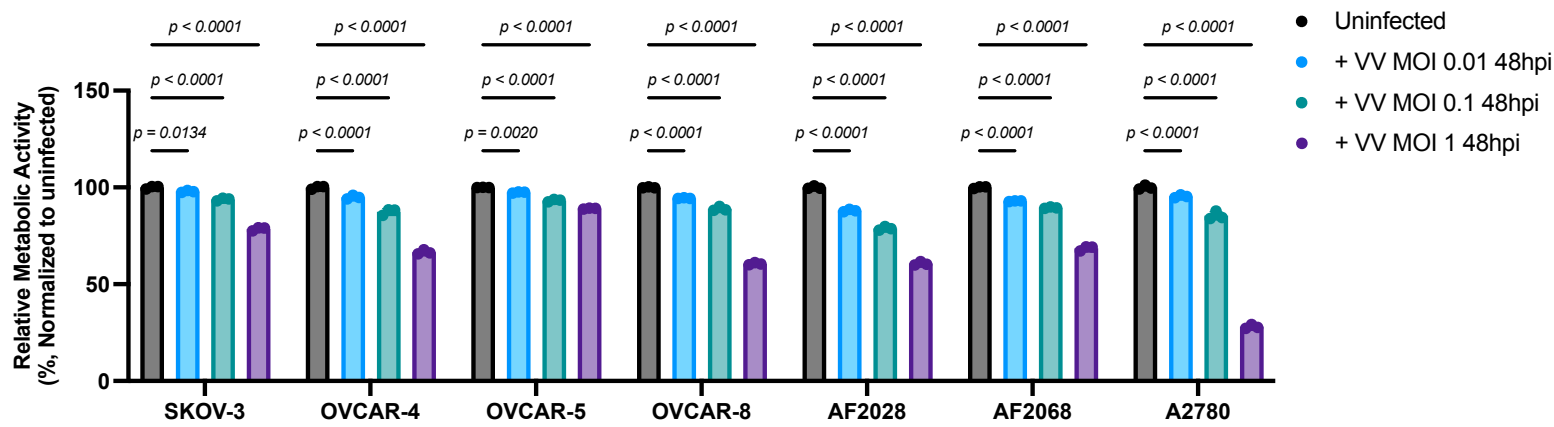

b

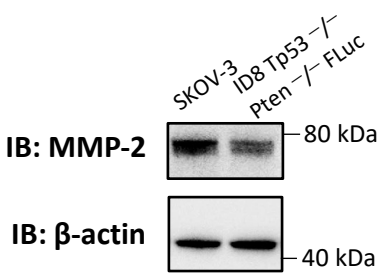

c

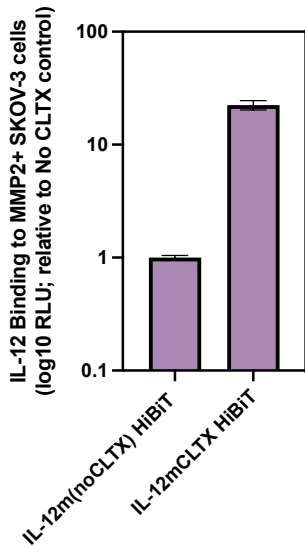

d

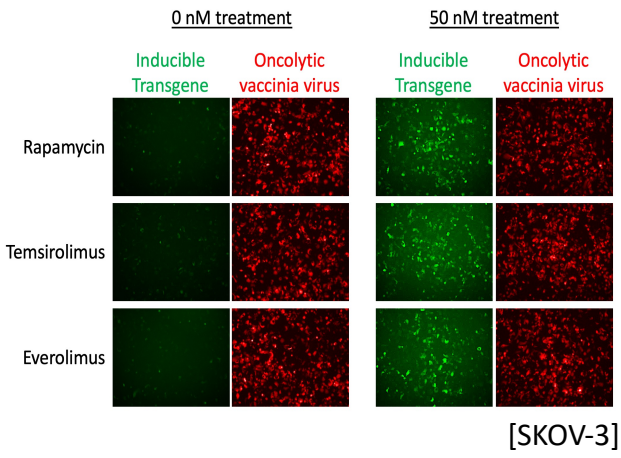

e

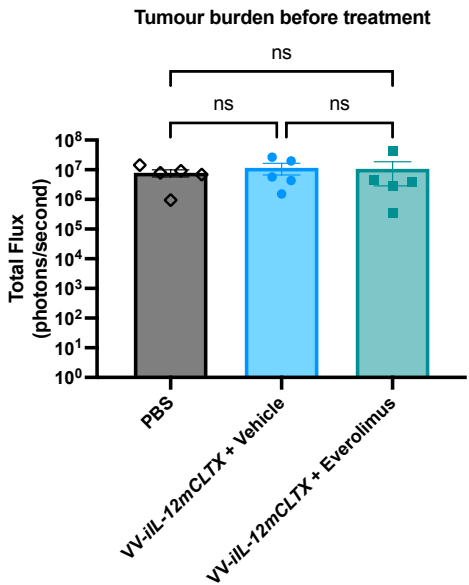

Supplement: s1 [file s1]
